# Supplementary material for: Detection of driver mutations and genomic signatures in endometrial cancers using artificial intelligence algorithms
Source: PubMed Central journal article supplement (PMC10896512; doi:10.1371/journal.pone.0299114), 2024-02-26

Supplementary Figure S1. Distribution of coding mutations in all EC histology types.

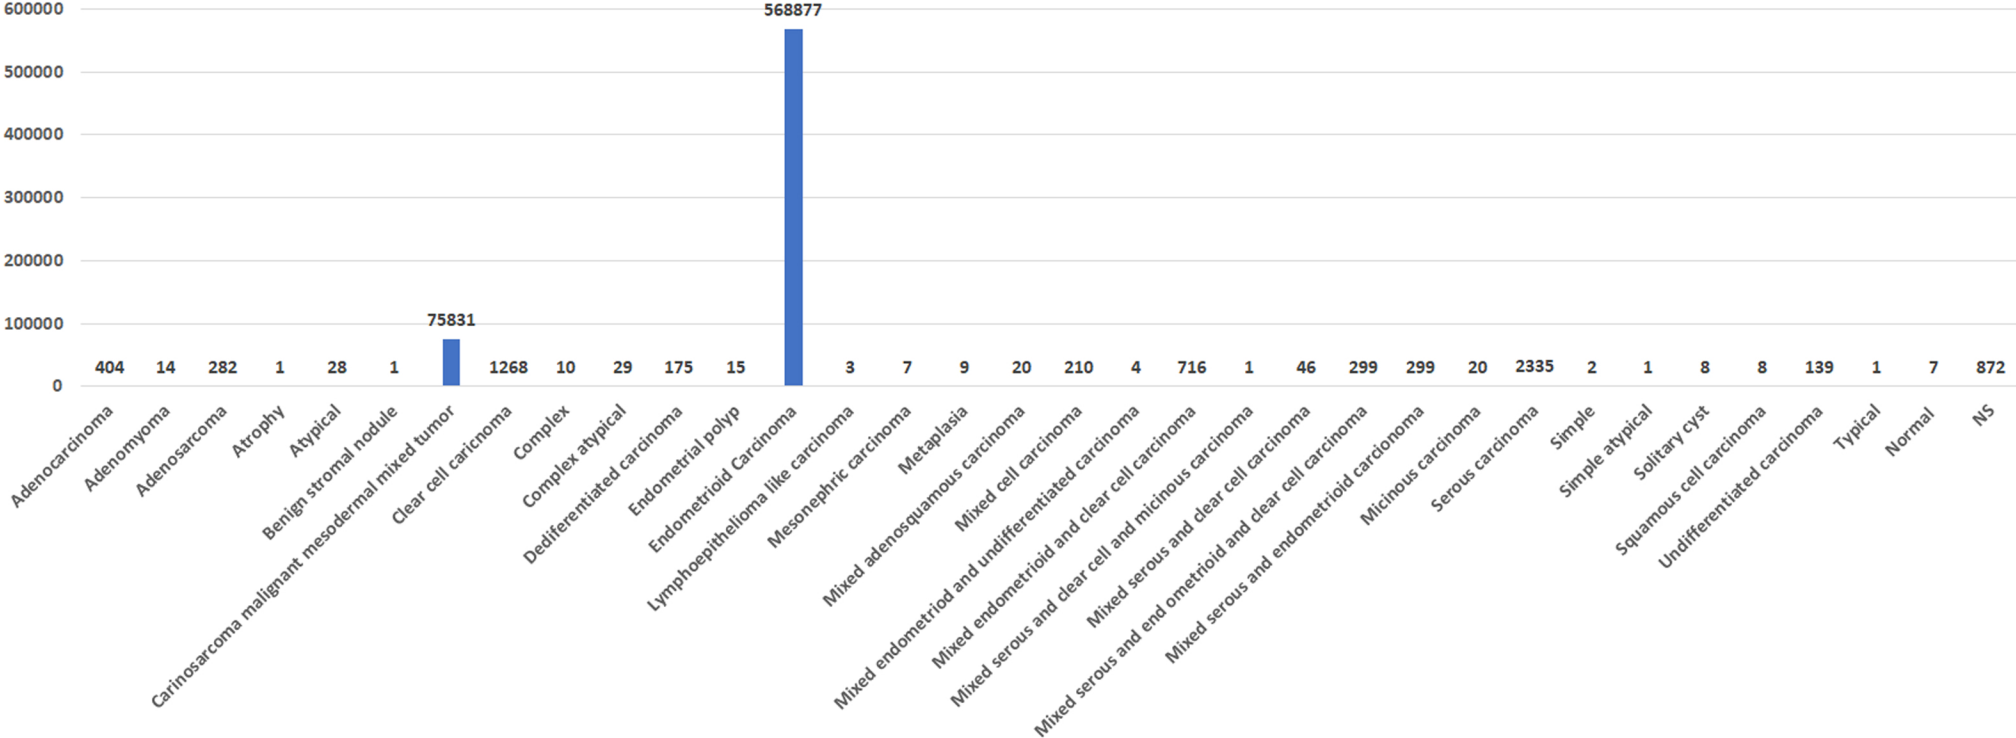

Supplement: pone.0299114.s001.pdf [file pone.0299114.s001.pdf]
