# Supplementary material for: Detection of driver mutations and genomic signatures in endometrial cancers using artificial intelligence algorithms
Source: PubMed Central journal article supplement (PMC10896512; doi:10.1371/journal.pone.0299114), 2024-02-26

Supplementary Figure S2. Over-expressed genes in TCGA endometrial cancer samples.

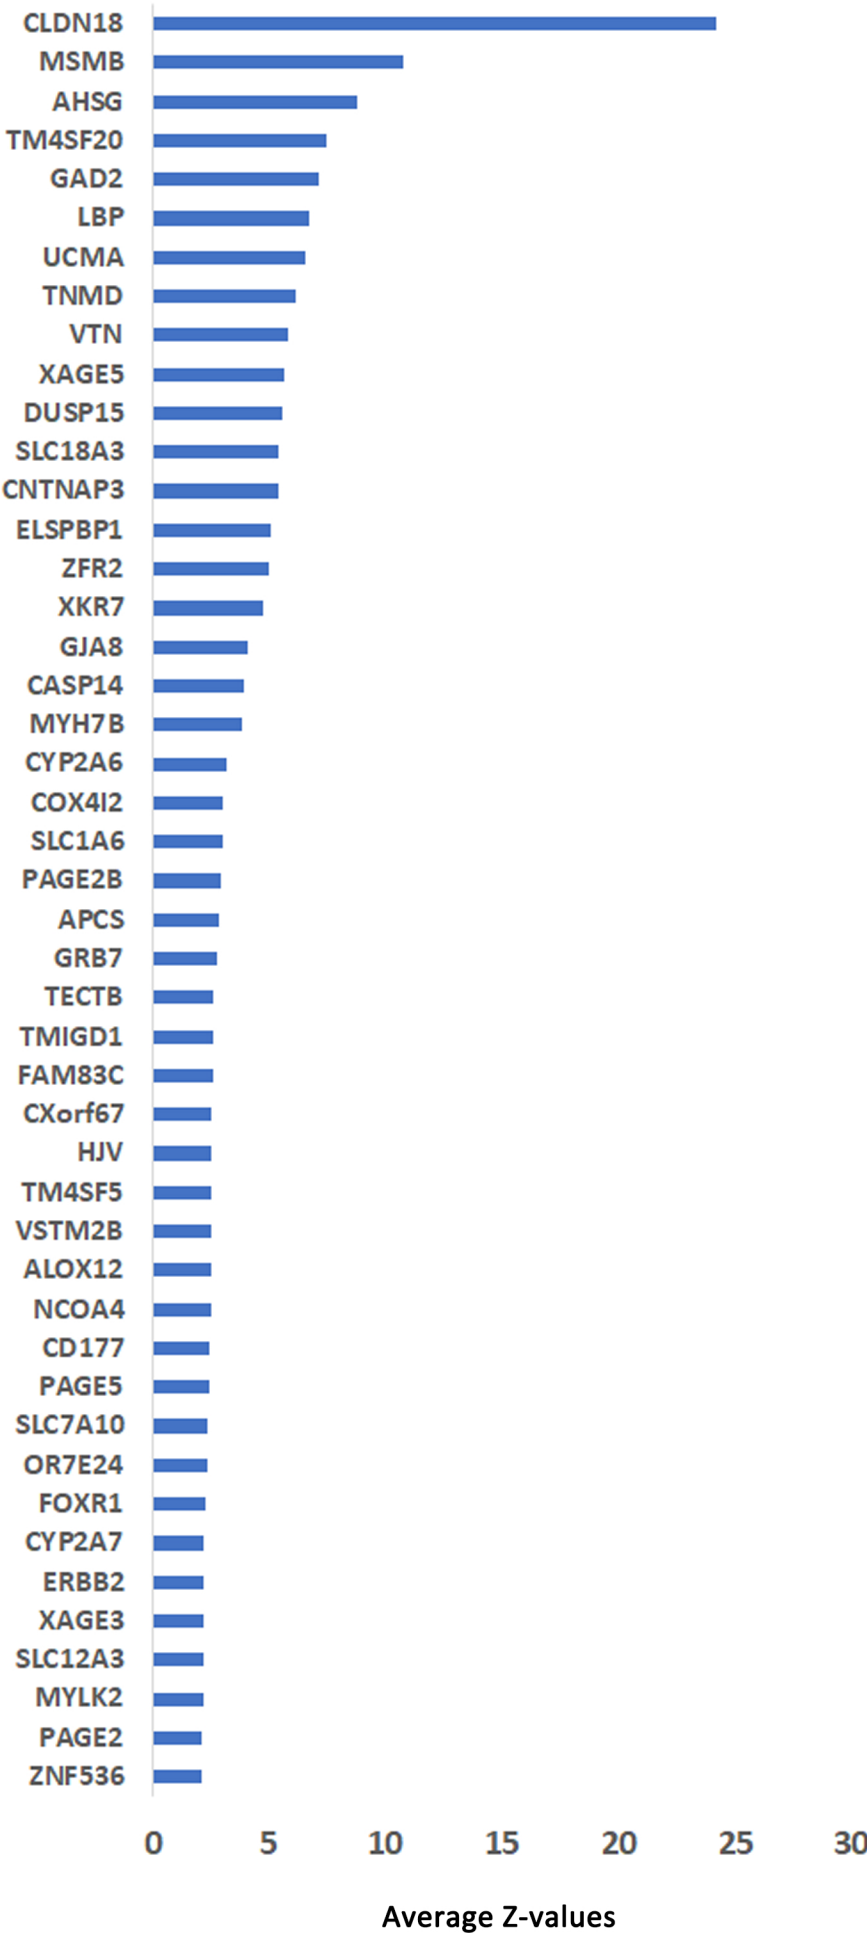

Supplement: pone.0299114.s002.pdf [file pone.0299114.s002.pdf]
