# Supplementary material for: Detection of driver mutations and genomic signatures in endometrial cancers using artificial intelligence algorithms
Source: PubMed Central journal article supplement (PMC10896512; doi:10.1371/journal.pone.0299114), 2024-02-26

Supplemental Figure S5. Mutations observed to effect electrostatic surface potential

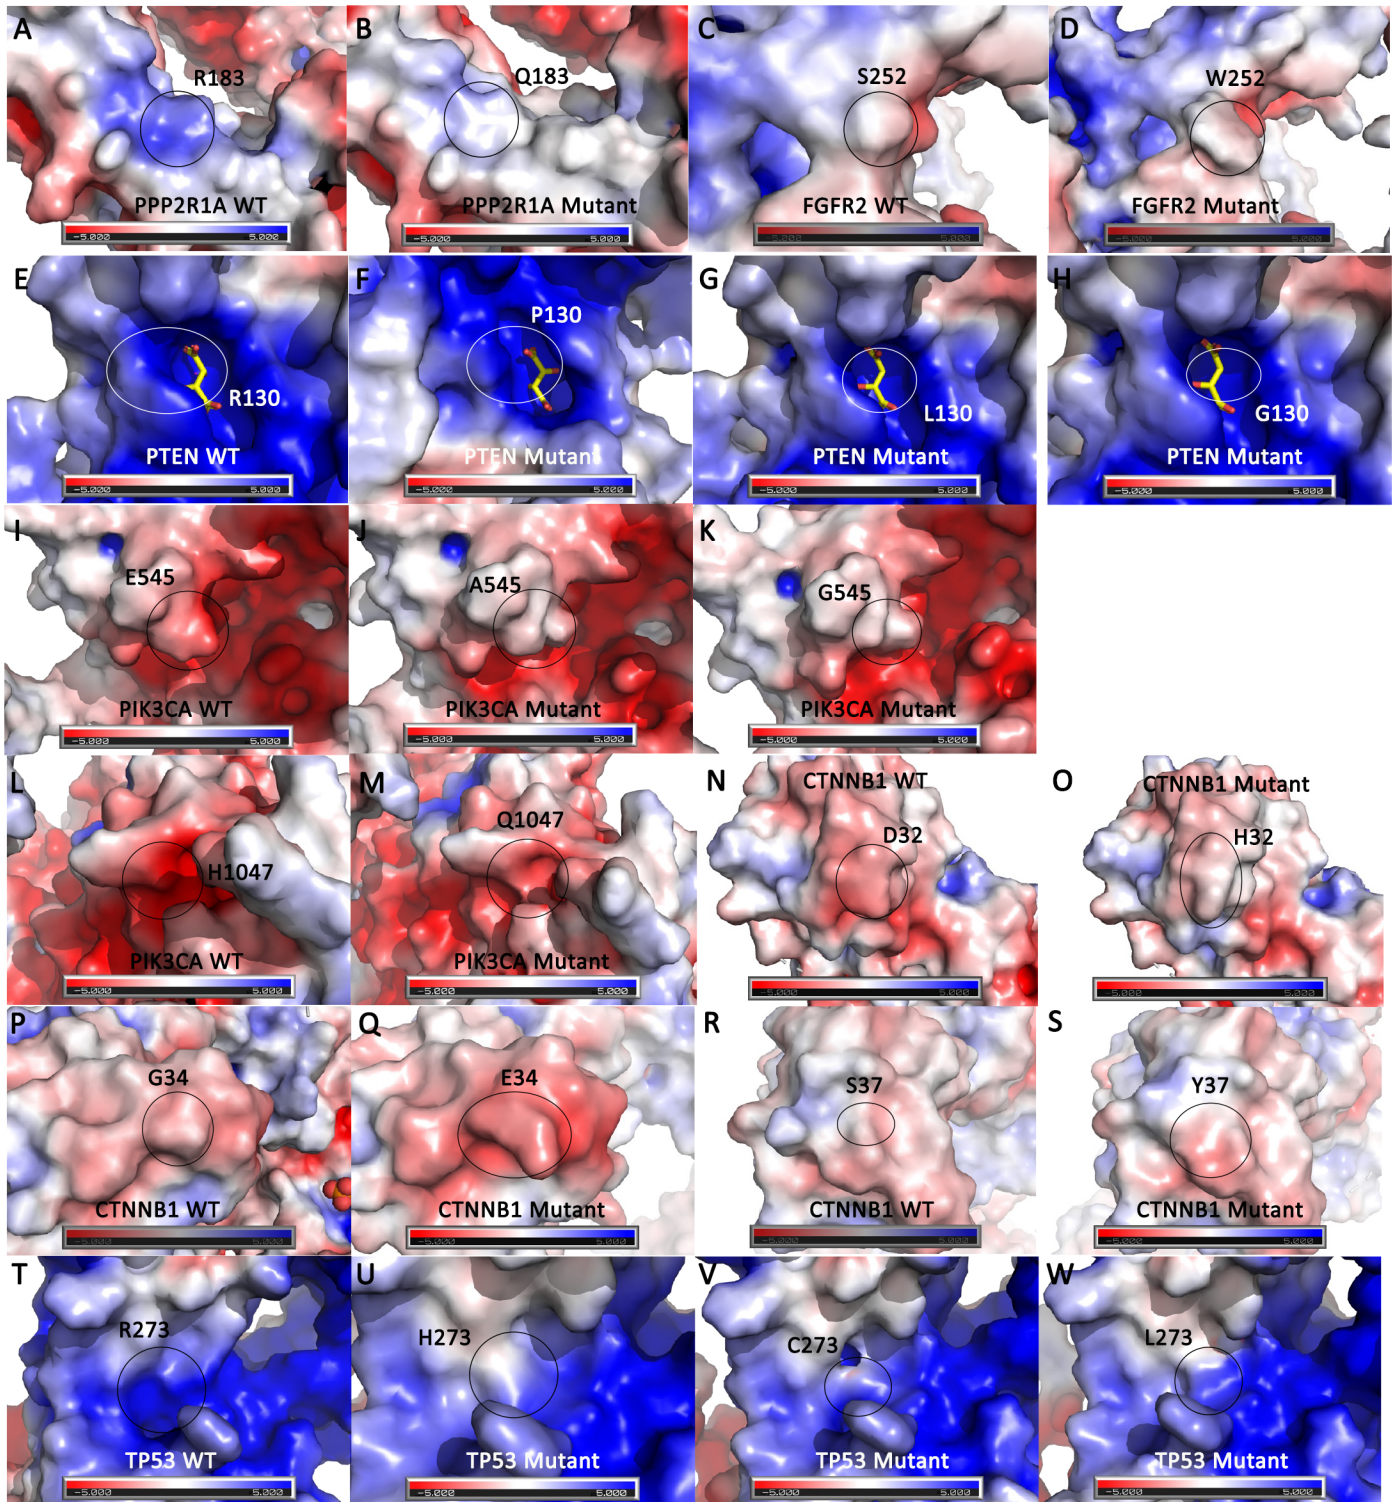

Supplement: pone.0299114.s005.pdf [file pone.0299114.s005.pdf]
